# Supplementary material for: Defect-driven antiferromagnetic domain walls in CuMnAs films
Source: Springer Nature journal article supplement (doi:10.1038/s41467-022-28311-x), 2022-02-07
Supplement: 41467_2022_28311_MOESM3_ESM.pdf [file 41467_2022_28311_MOESM3_ESM.pdf]

**Title:** Supplementary Movie 1

**Description:** RSM of the CuMnAs 003 Bragg peak. RSMs obtained from a microtwinfree area (left) and from an area with microtwins (right) for viewing angles around the surface normal. The vertical direction is along  $q_{[001]}$ , The isosurface is shown in green and planar projections of the RSM are shown in the two panels.
